# Supplementary material
Source: PubMed Central journal article supplement (PMC3371170)

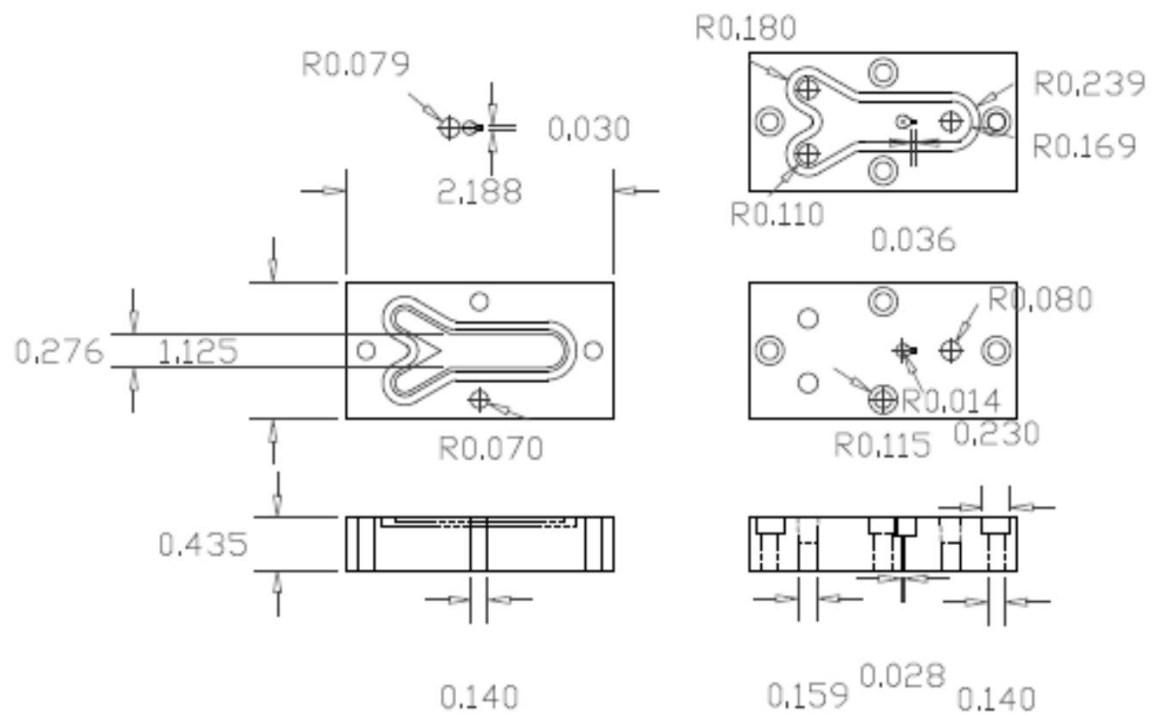

Microfluidic Flow Cell  
(units in inches)

Supplement: NIHMS372516-supplement-ESI.pdf [file NIHMS372516-supplement-ESI.pdf]
